# Supplementary material for: CRISPR/Cas9 Mediates Efficient Conditional Mutagenesis in Drosophila
Source: PubMed Central journal article supplement (PMC4232542; doi:10.1534/g3.114.014159), 2014-09-05
Supplement: supp_g3.114.014159_014159SI.pdf [file supp_g3.114.014159_014159SI.pdf]

**CRISPR/Cas9 mediates efficient conditional mutagenesis in *Drosophila***

Zhaoyu Xue<sup>1</sup>, Menghua Wu<sup>1</sup>, Kejia Wen<sup>1</sup>, Menda Ren<sup>1</sup>, Li Long<sup>1</sup>, Xuedi Zhang<sup>1</sup> and Guanjun Gao<sup>1, \*</sup>

<sup>1</sup>School of Life Sciences, Tsinghua University, Beijing 100084, China

\*Corresponding author:

Guanjun Gao, School of Life Sciences, Tsinghua University, Yuanmingyuan Road 1, Beijing 100084, China. E-mail:

gaogu@mail.tsinghua.edu.cn

**DOI: 10.1534/g3.114.014159**

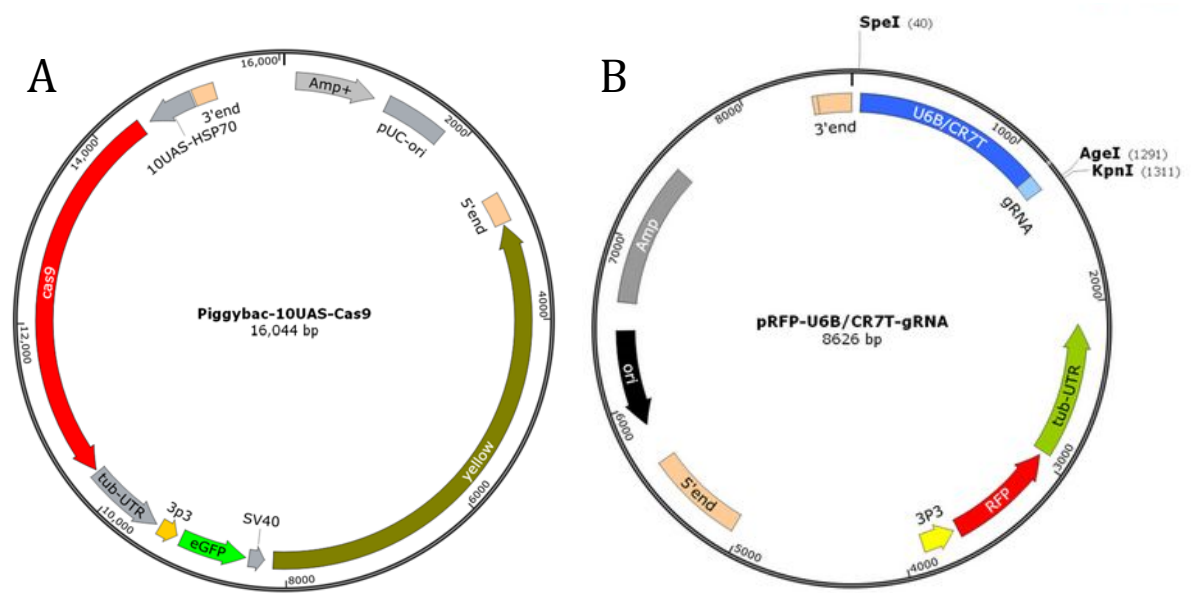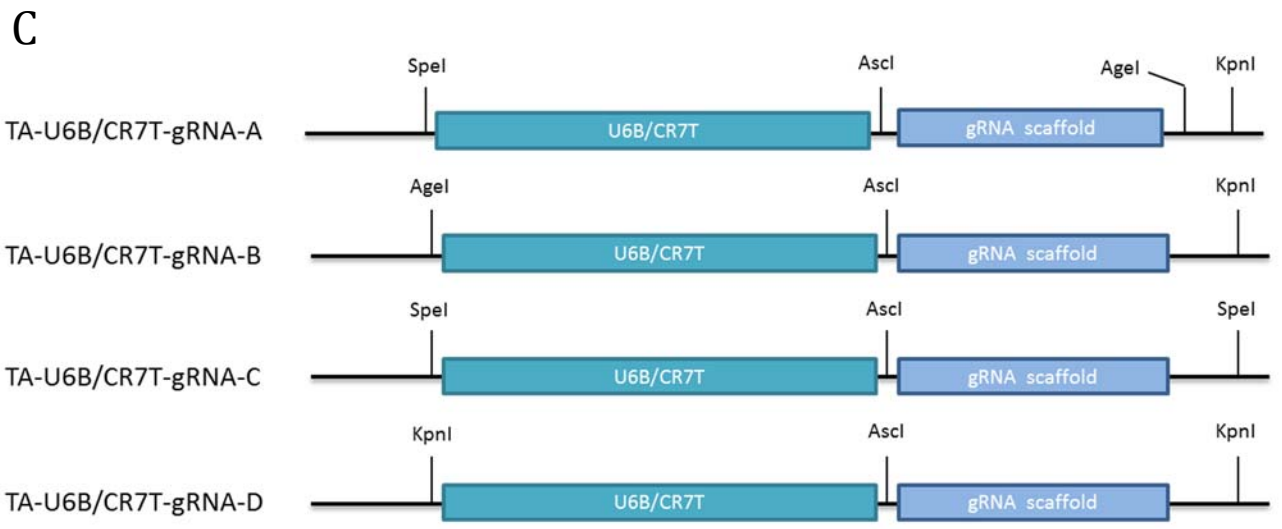

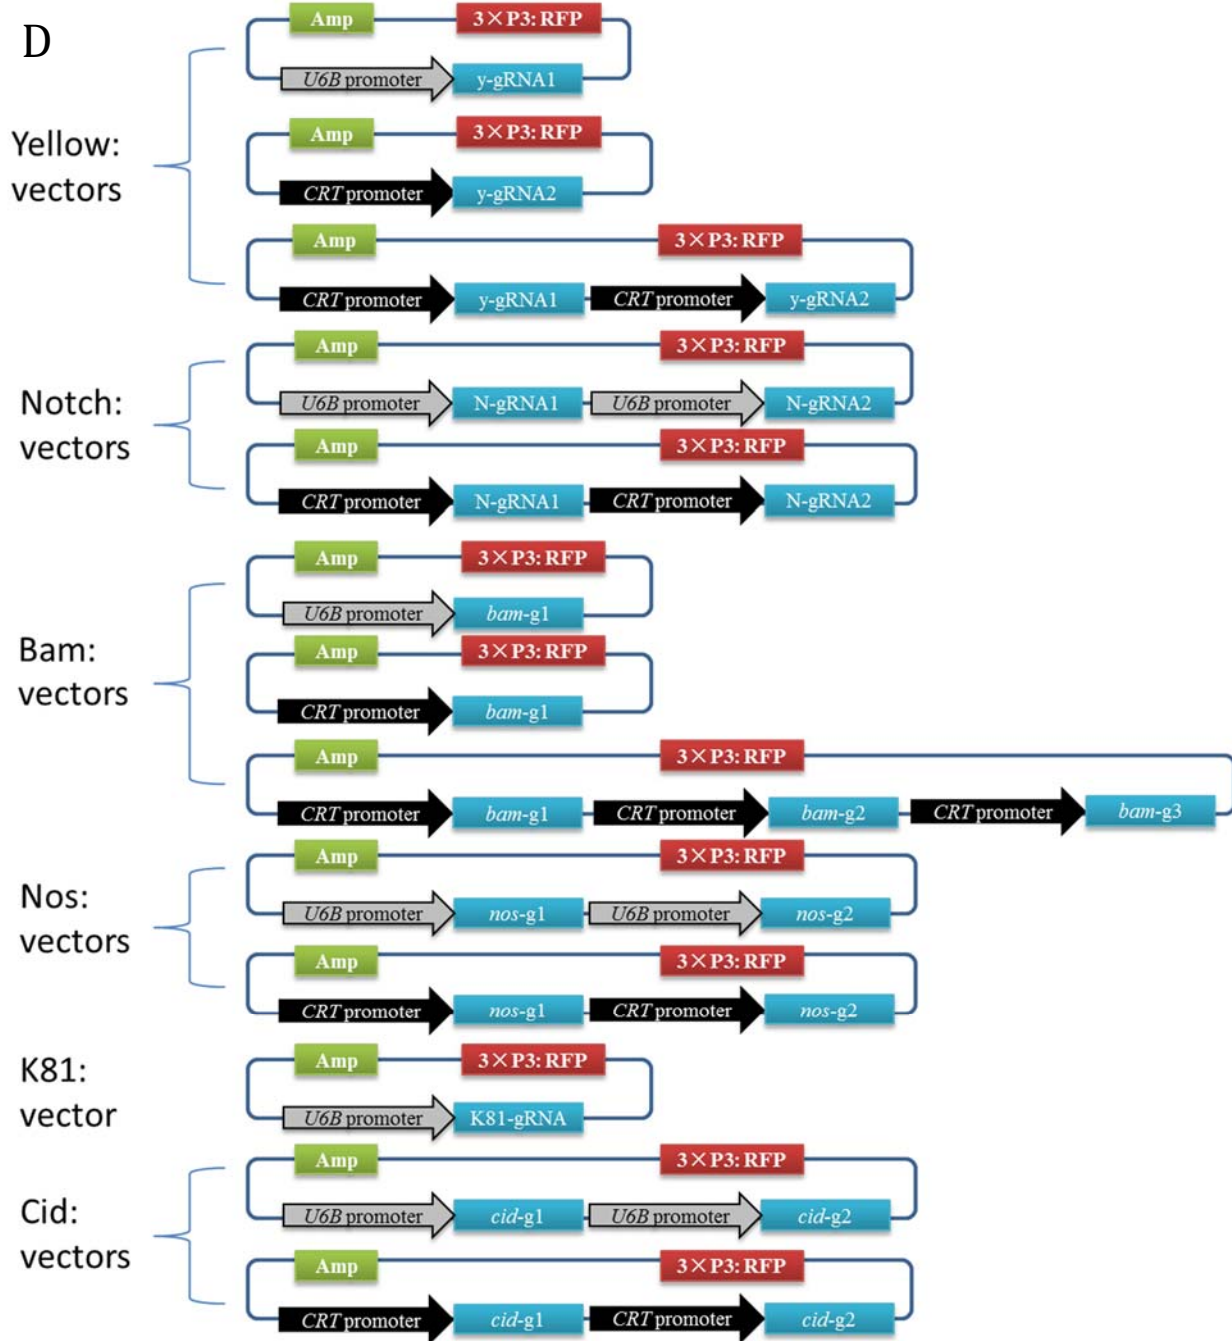

**Figure S1** Maps of the plasmids. (A) Piggybac-10UAS-cas9, (B) pRFP-U6B/CR7T-gRNA, and (C) the four backbone plasmids for gRNA insertion. (D) Maps of all transgenic gRNA vectors.

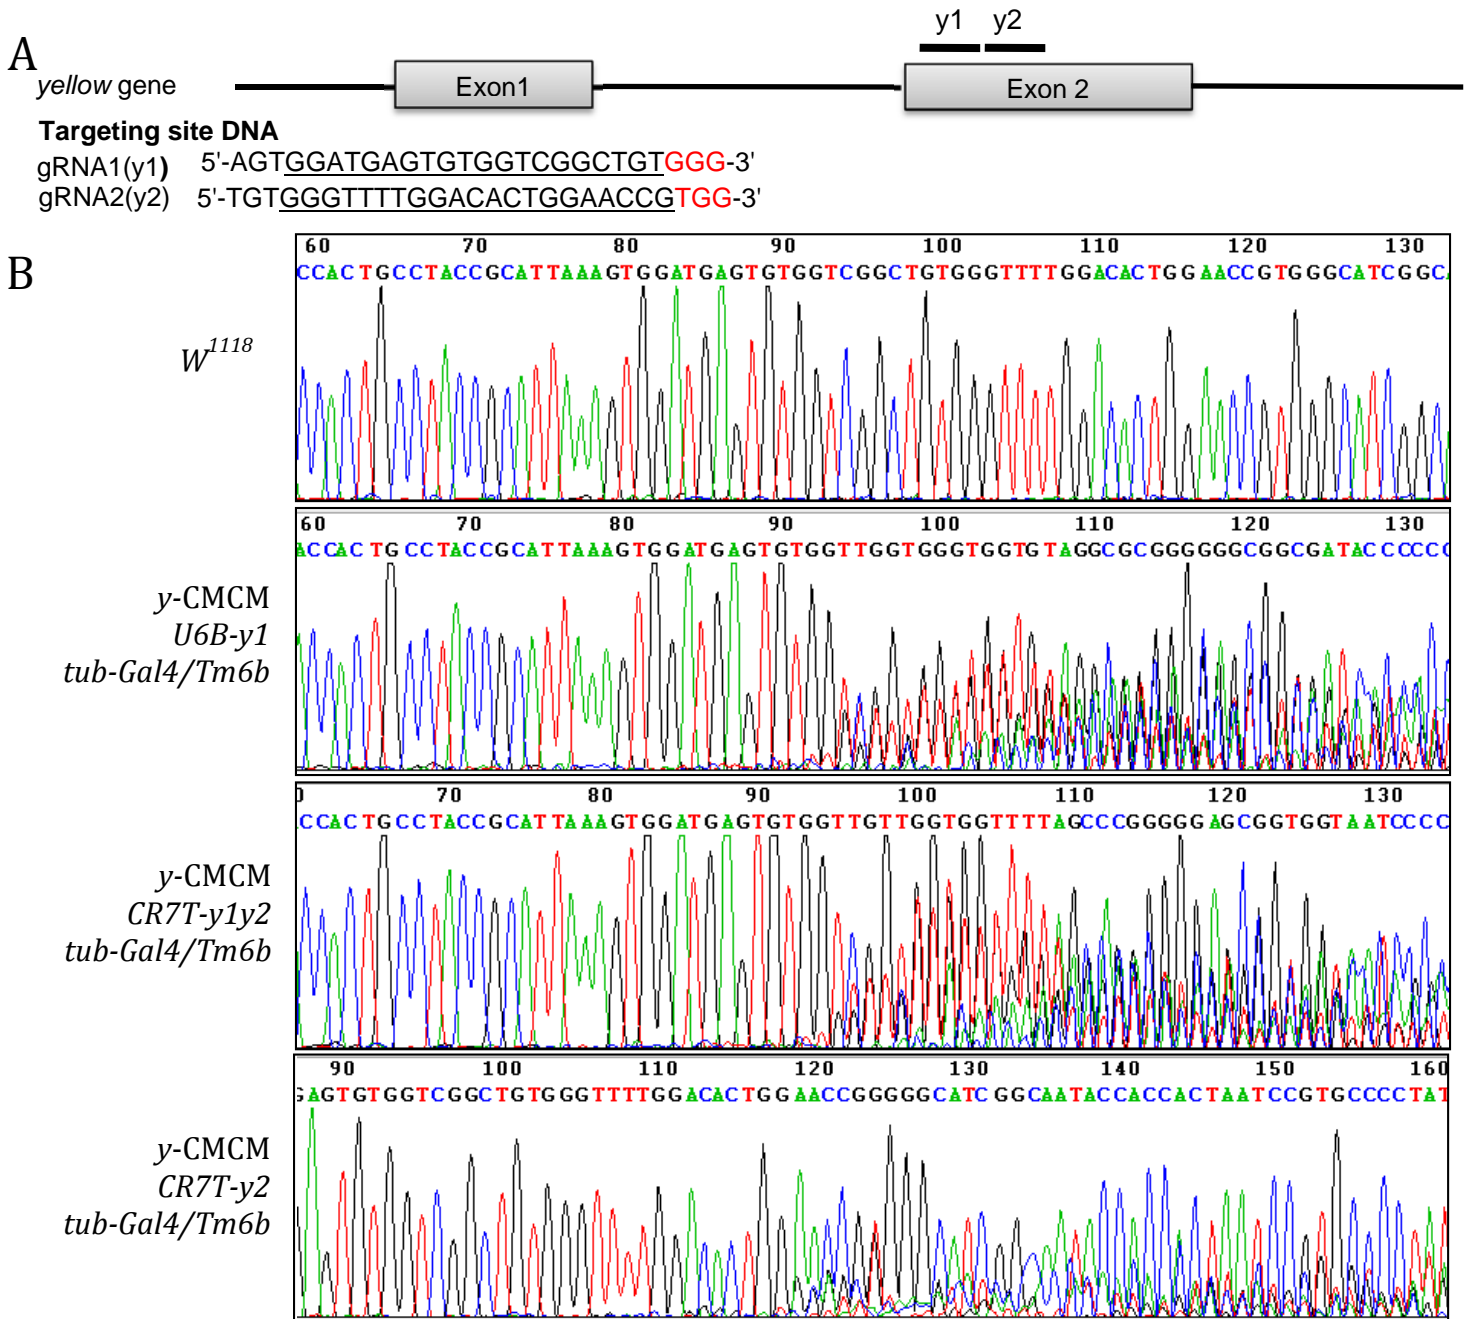

**Figure S2** Sequence results for the *y* conditional mutant flies. (A) Sequences and schematic representation of the two gRNAs against the *y* gene. (B) *Tub-Gal4/Tm6b* was used to drive the expression of Cas9 in whole bodies, and three vectors, *U6B-y1*, *CR7T-y2*, and *CR7T-y1y2*, were used to drive the expression of gRNA. The mutations were induced exactly at the target locus. *w<sup>1118</sup>* was used as the control.

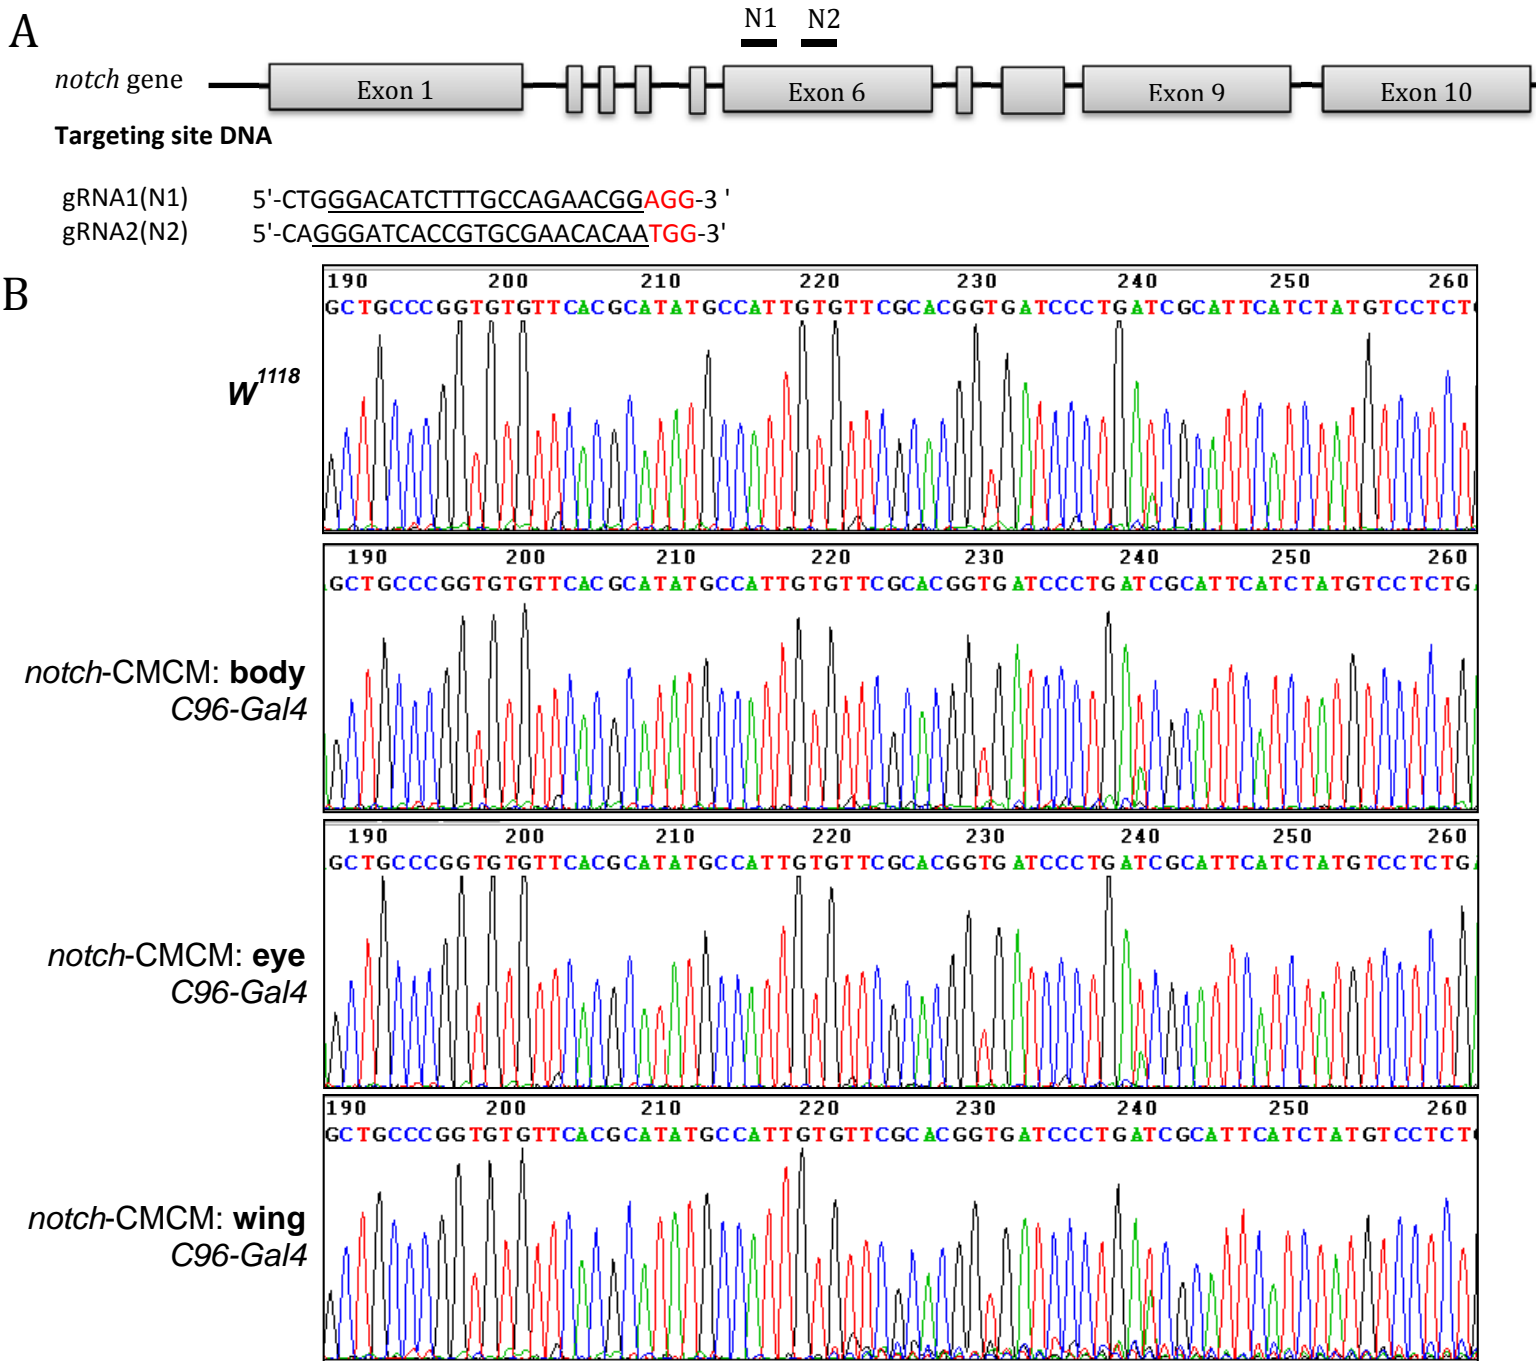

**Figure S3** Sequence results for *notch* conditional mutant flies. (A) Sequences and schematic representation of two gRNAs against the *notch* gene. (B) *C96-Gal4* was used to drive the expression of Cas9 specifically in the blade region of the wing imaginal disc. The body, eye, and wing from the *notch* conditional mutant flies were sequenced. The mutation was induced only in the wing tissue at the target locus. *w*<sup>1118</sup> was used as the control.

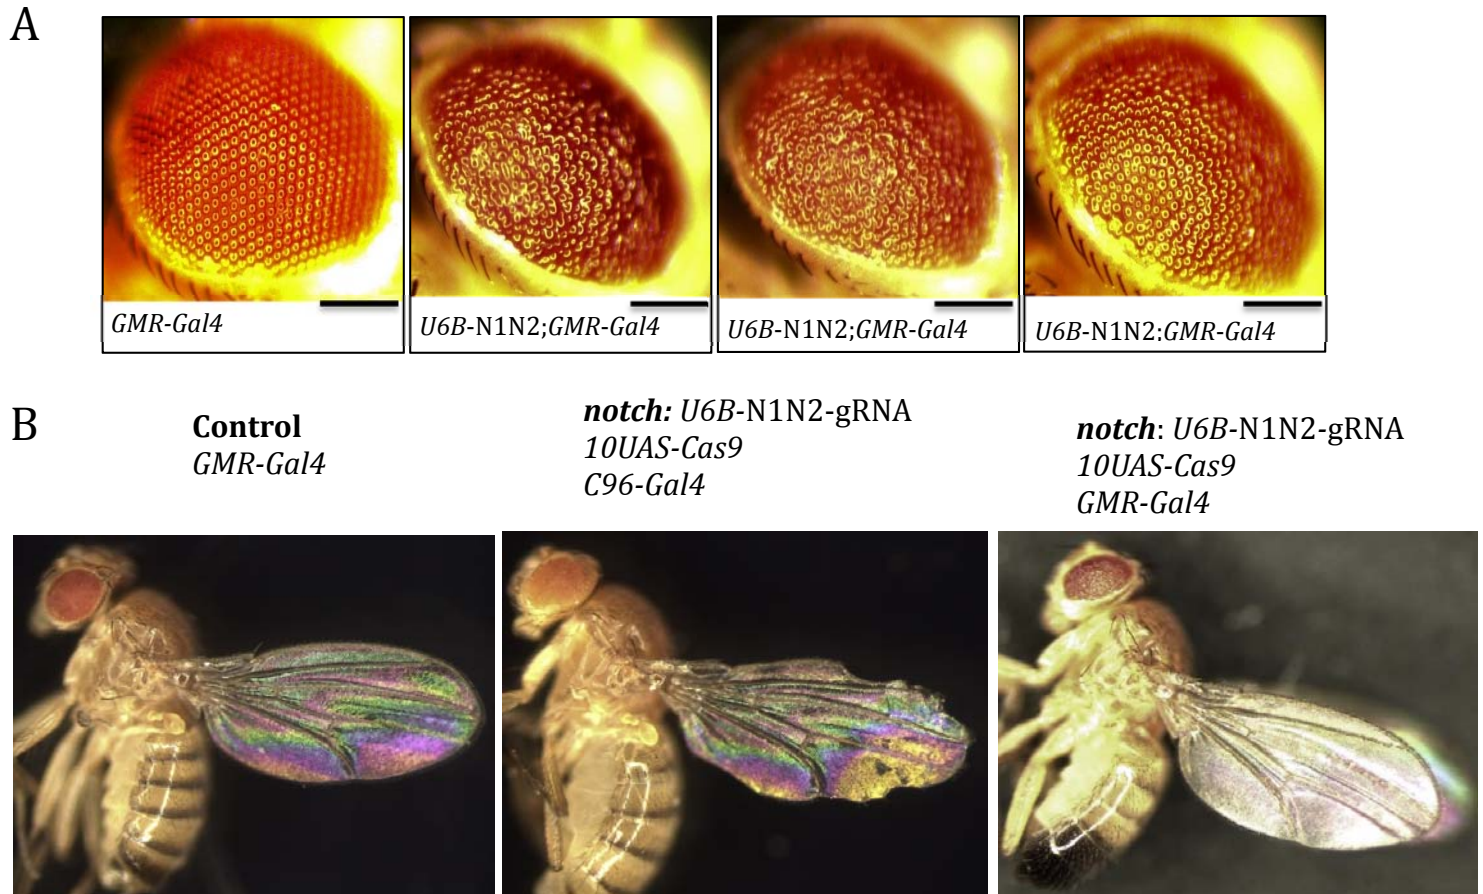

**Figure S4** Phenotypes resulting from the conditional *notch* mutation in the eye and wing. (A) The conditional mutant flies showed rougher eyes than the *GMR-Gal4* control. Scale bars: 100  $\mu$ m. (B) The whole-fly images for *notch* conditional mutagenesis are shown. The left-hand image used the *GMR-Gal4* fly as a control, the middle image is from the *notch* conditional mutagenesis driven by wing-specific *C96-Gal4*, and the right-hand image is from the *notch* conditional mutagenesis driven by eye-specific *GMR-Gal4*. *U6B-N1N1* was used to drive the expression of gRNA.



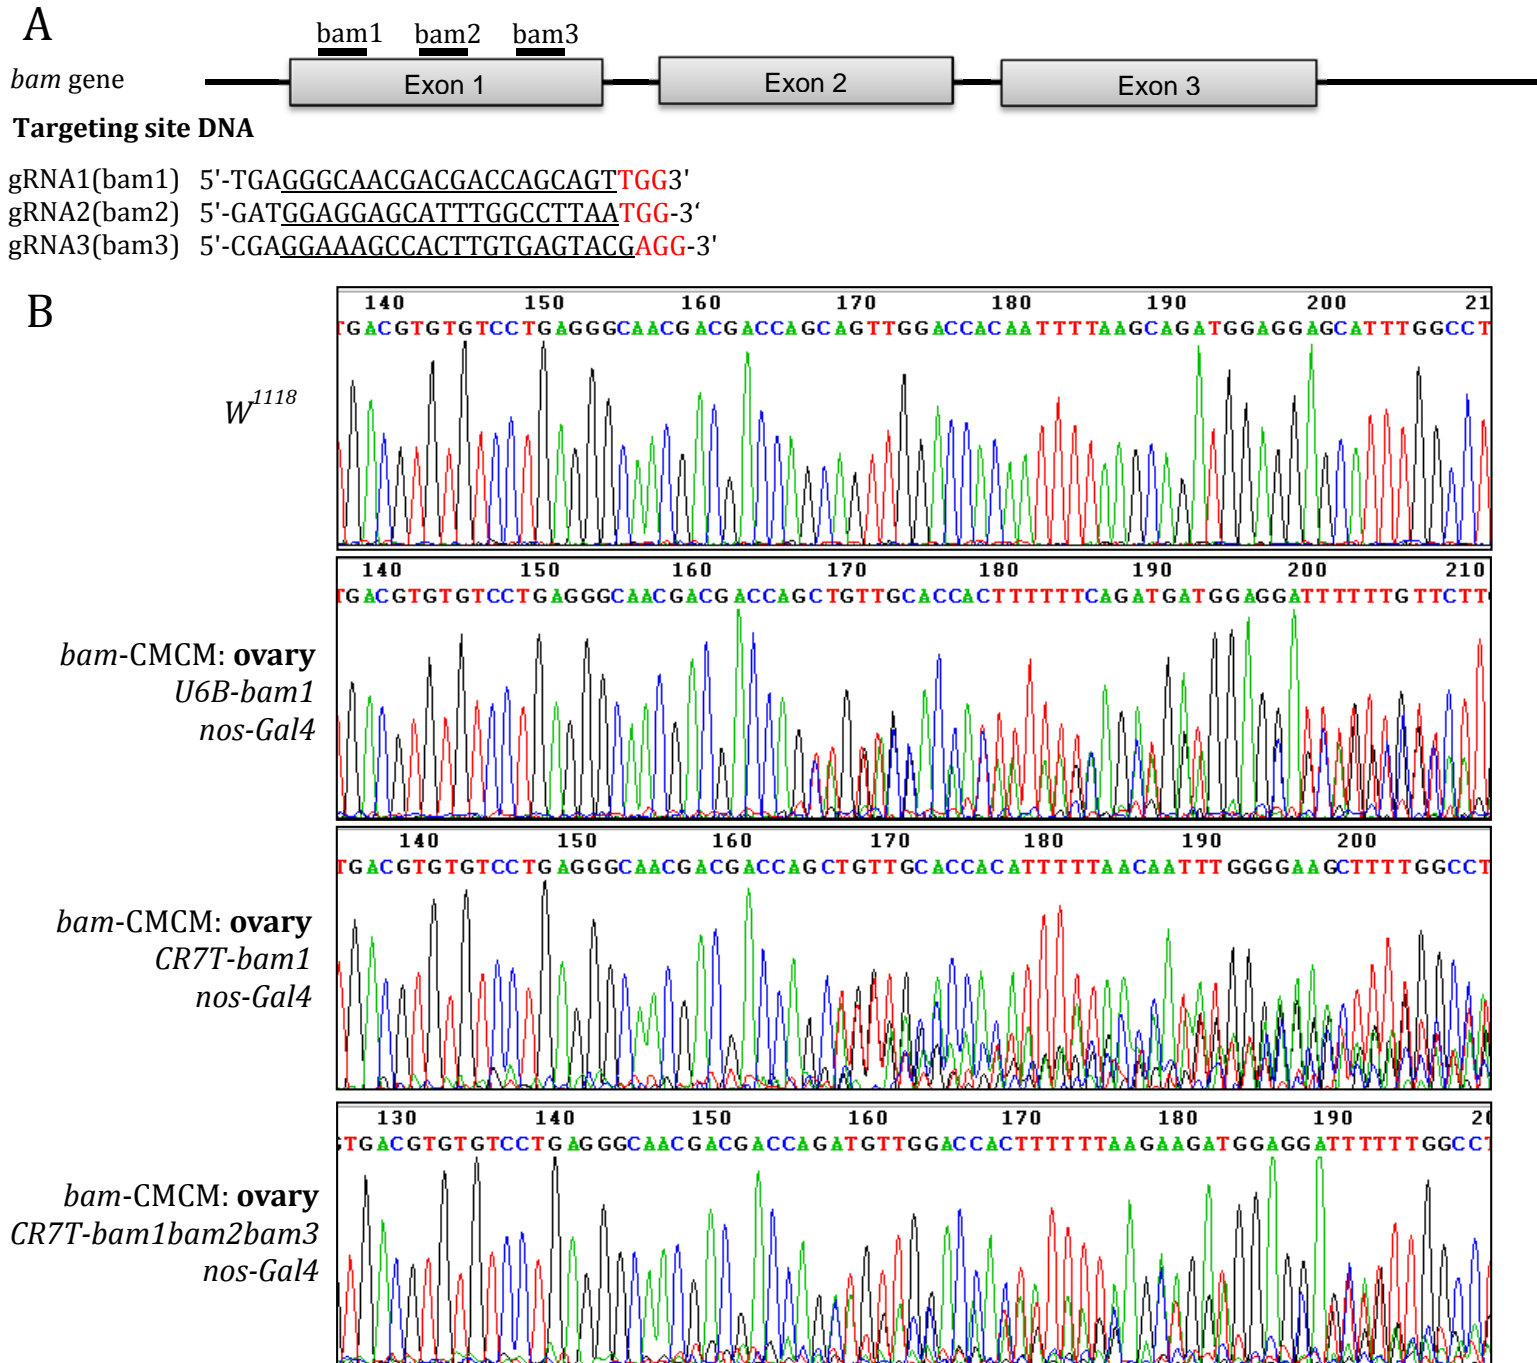

**Figure S5** Sequence results for the ovaries of *bam* conditional mutant flies. (a) The sequences and a schematic representation of three gRNAs against the *bam* gene are shown. (b) *Nos-Gal4* was used to drive the expression of Cas9 specifically in the ovary, and three vectors, *U6B-bam1*, *CR7T-bam2*, and *CR7T-bam1bam2bam3*, were used to drive the expression of gRNA. The mutations were induced exactly at the target locus. A *w*<sup>1118</sup> fly was used as the control.

A

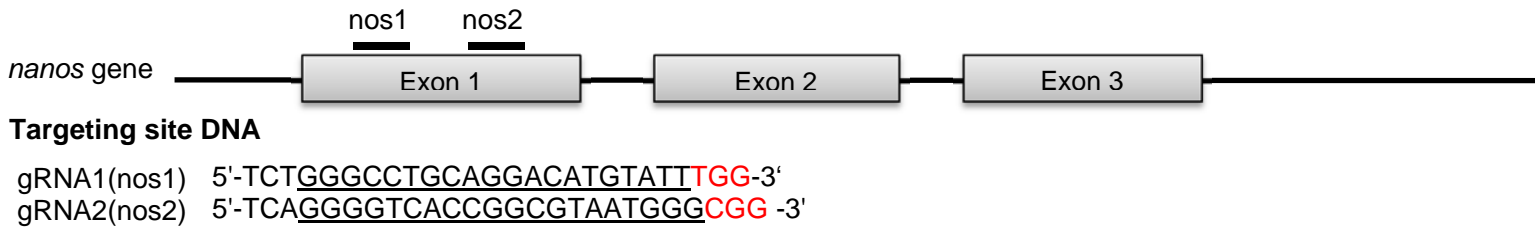

B

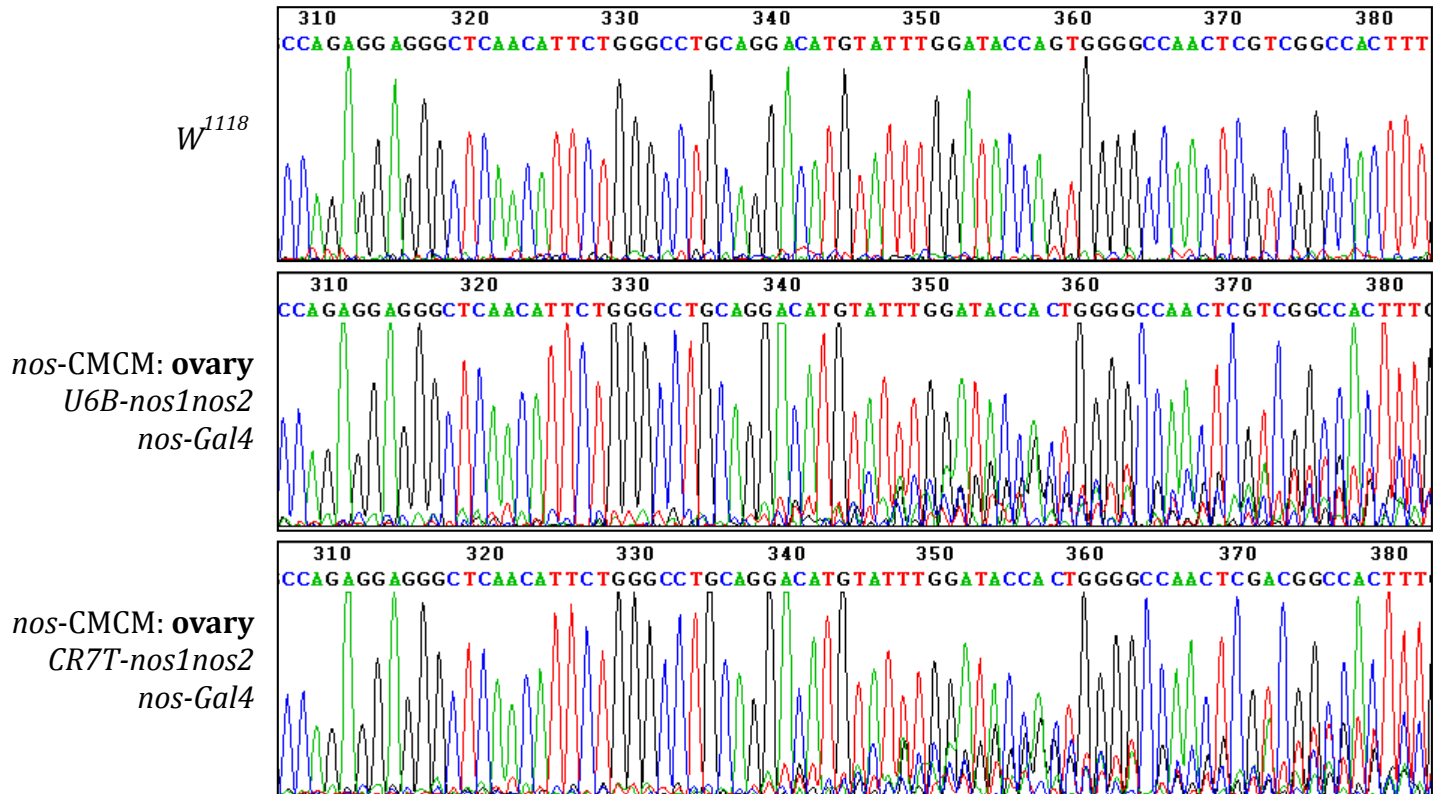

**Figure S6** Sequence results for the ovaries of *nos* conditional mutant flies. (a) The sequence and a schematic representation of two gRNAs for the *nos* gene are shown. (b) *Nos-Gal4* was used to drive the expression of Cas9 specifically in the ovary, and two vectors, *U6B-nos1nos2* and *CR7T-nos1nos2*, were used to drive the expression of gRNA. The mutations were induced exactly at the target locus. A *w*<sup>1118</sup> fly was used as the control.



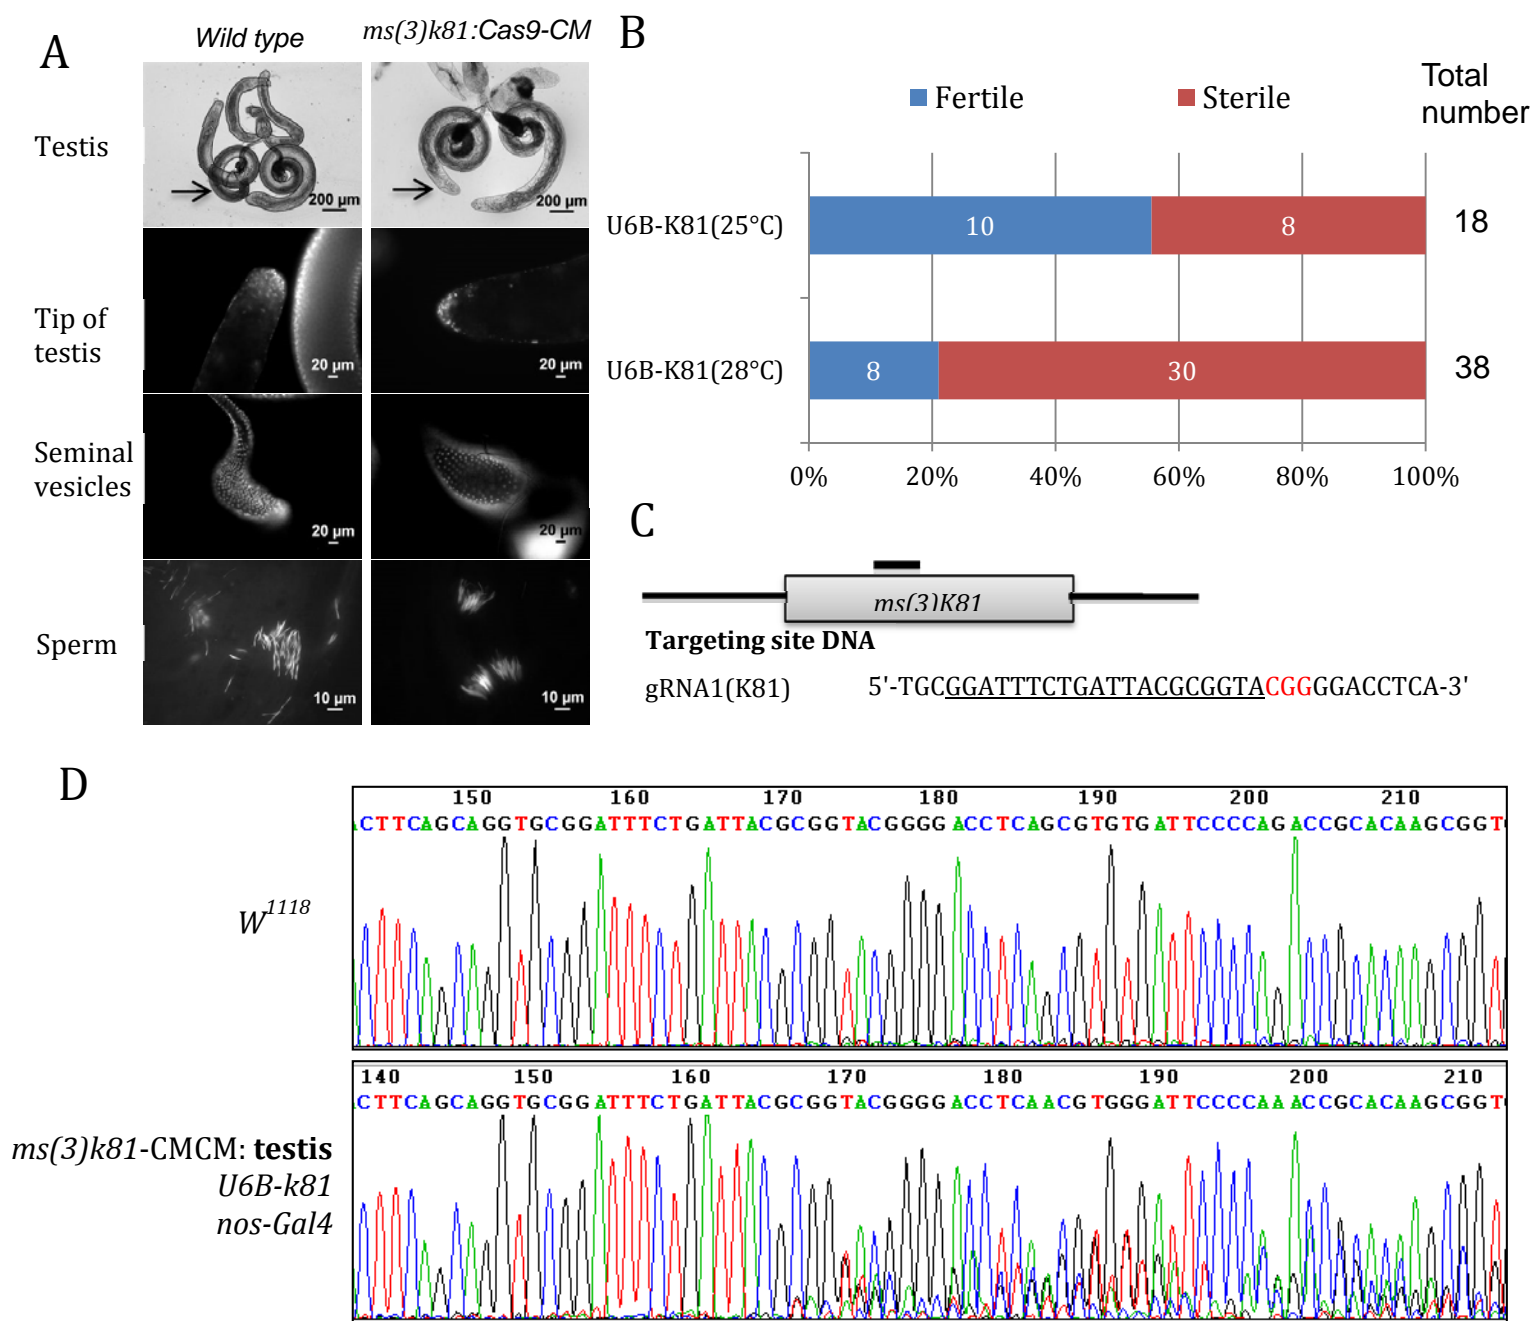

**Figure S7** Conditional mutation of the *ms(3)k81* gene via the Cas9-mediated conditional mutagenesis (CMCM) system. (A) From the top to bottom of each column: whole testis (light), tip of the testis (DAPI), seminal vesicles (DAPI), and sperm detection (DAPI). *Nos-Gal4* was used to drive the expression of Cas9, and *U6B-K81* was used to drive the expression of gRNA. *ms(3)k81:Cas9-CM* was the testis from conditional mutant fly via the CMCM system. (B) Results of a fertility test are shown for flies for the CMCM system using the *ms(3)k81* gene. (C, D) The sequences and

a schematic representation of gRNAs against the *ms(3)k81* gene. Sequence results for the testes from the *ms(3)k81* conditional mutant flies. The mutations induced by CMCM are located at the targeted locus.

>10UAS-HSP70 promoter

```
GGCTCGATCCGCTTGCATGCCTGCAGGTCGGAGTACTGTCCTCCGAGCGGAGTACTGTCCTCC
GAGCGGAGTACTGTCCTCCGAGCGGAGTACTGTCCTCCGAGCGGAGTACTGTCCTCCGAGCGG
AAGCTTGCATGCCTGCAGGTCGGAGTACTGTCCTCCGAGCGGAGTACTGTCCTCCGAGCGGAG
TACTGTCCTCCGAGCGGAGTACTGTCCTCCGAGCGGAGTACTGTCCTCCGAGCGGAGACTCTA
GCGAGCGCCGGAGTATAAATAGAGGGCGCTTCGTCTACGGAGCGACAATTCAATTCAAACAAG
CAAAGTGAACACGTCGCTAAGCGAAAGCTAAGCAAATAAAACAAGCGCAGCTGAACAAGCTA
AACAATCTGCAGTAAAGTGCAAGTTAAAGTGAATCAATTAAGTAACCAGCAACCAAGTAA
ATCAACTGCAACTACTGAAATCTGCCAAGAAGTAATTATTGAATACAAGAAGAGAAGTCTGA
ATAGGGAATTGG
```

> $\alpha$ Tub84B 3'-UTR

```
CGGCCATCGAATTCGAGCTCGCCCACTAAGCGTCGCGCCACTTCAACGCTCGATGGGAGCGTC
ATTGGTGGGCGGGGTAACCGTCGAAATCAGTGTTCACGCTTCCAATCGCAACAAAAAATTCAC
TGCAACACTGAAAAGCATAACGAAAACGATGAAGATTGTACGAGAAACCATAAAGTATTTTAT
CCACAAAGACACGTATAGCAGAAAAGCCAAGTTAACTCGGCGATAAGTTGTGTACACAAGAA
TAAAATCGGCCAGATTCAGTGTTCAGAAAATAAGAAAACCCCACTATGTTTTTCTTTGCCTTT
TCTTTCTCCAGCGATCATTCAATTCGTGGTGAAAGAACGGGGTCATTGCACGGAGTTTCGACT
GCGGGAAAGCAGAGCTGCCGTTCACTTCGTCTATAATTAGCGCTTTCTATTTTCCCGATTTCGG
GCCGCTGCTGCGCTTTTCCGCTGCTGTTTGTGGCAAGTGTAGCAGCAGGCTGTGCACGCAGT
GTGGCATGCACTTGGCTTTCCACCGTTGGTATCGATTCTCTGGGACGATGAGTCATTCCTTTTCG
GGGCCACAGCATAATCGTTGCCAGCTCACCGAAATGGTGACTTCATTTCTTAACTGCCGTCAA
GCATGCGATTGTACATACATACATATTTATATATGTACATATTTATGTGACTATGGTAGGTCGA
TATAATAGCAATCAACGCAAGCAAATGTGTCAGTCCTGCTTACAGGAACGATTCTATTTAGTA
ATTTTCGTTGTATAAAGTAATTATGTATGTATGTAAGCCCCATAAATCTGAAACAATTAGGCA
AAACCATGCGAAGCTCTCTA
```

**Figure S8** Sequences of the 10UAS-HSP70 promoter and  $\alpha$ Tub84B 3'-UTR used in this study.

**Table S1 Sites targeted for each *Drosophila* gene and pRFP-gRNA constructions for the target loci.**

| Target gene                             |      | Target site (5' to 3') (PAM is underlined) | pRFP-gRNA                                | Number of gRNA |
|-----------------------------------------|------|--------------------------------------------|------------------------------------------|----------------|
| <i>yellow</i>                           | y1   | GGATGAGTGTGGTCGGCTGT <u>GGG</u>            | pRFP-U6B-y1-gRNA                         | 1              |
|                                         | y2   | GGGTTTTGGACACTGGAACCGT <u>G</u> G          | pRFP-CR7T-y2-gRNA<br>pRFP-CR7T-y1y2-gRNA | 1<br>2         |
| <i>notch</i>                            | N1   | GGACATCTTTGCCAGAACGG <u>AGG</u>            | pRFP-U6B-N1N2-gRNA                       | 2              |
|                                         | N2   | GGGATCACCGTGCGAACACAAT <u>G</u> G          | pRFP-CRT-N1N2-gRNA                       | 2              |
| <i>bag of marbles</i><br>( <i>bam</i> ) | bam1 | GGGCAACGACGACCAGCAGTT <u>G</u> G           | pRFP-U6B-bam1-gRNA                       | 1              |
|                                         | bam2 | GGAGGAGCATTTGGCCTTAAT <u>G</u> G           | pRFP-CR7T-bam1-gRNA                      | 1              |
|                                         | bam3 | GGAAAGCCACTTGTGAGTACG <u>AGG</u>           | pRFP-CR7T-bam1bam2bam3-gRNA              | 3              |
| <i>nanos</i>                            | nos1 | GGGCCTGCAGGACATGTATT <u>T</u> G            | pRFP-U6B-nos1nos2-gRNA                   | 2              |
|                                         | nos2 | GGGGTCACCGCGTAATGGG <u>C</u> G             | pRFP-CR7T-nos1nos2-gRNA                  | 2              |
| <i>cid</i>                              | cid1 | GGACGCCGGACGGAGGCAGC <u>C</u> G            | pRFP-U6B-cid1cid2-gRNA                   | 2              |
|                                         | cid2 | GGAAAGCAAAACGCGAGCAGC <u>AGG</u>           | pRFP-CR7T-cid1cid2-gRNA                  | 2              |
| <i>ms(3)K81</i>                         | K81  | GGATTTCTGATTACGCGGTAC <u>G</u> G           | pRFP-U6B-K81-gRNA                        | 1              |

**Table S2 List of primers used to construct the 10UAS-Cas9/TA-gRNA vector.**

| <b>Plasmid</b>      | <b>Primer name</b>                | <b>Primer sequence (5' - 3') Forward and Reverse</b> |
|---------------------|-----------------------------------|------------------------------------------------------|
| piggyBac-10UAS-cas9 | 10UAS-XmaI-F                      | CCCGGGCTCGATCCGCTTGCATGC                             |
|                     | 10UAS-NotI-R                      | GCGGCCGCAATTCCCTATTCAGAGTTCTCTTCTT                   |
|                     | $\alpha$ Tub84B 3'UTR-XhoI-F      | CTACTACTACTCGAGCGGCCATCGAATTCGAGCTC                  |
|                     | $\alpha$ Tub84B 3'UTR-SpeI-Sall-R | CATCATCATGTGCGACACTAGTTAGAGAGCTTCGCATGGTTTTGCC       |
| TA-U6B/CR7T-gRNA -A | U6B-NotI-sphI-speI-FseI-F         | GCGGCCGCATGCACTAGTGGCCGGCCGTTTCGACTTGCAGCCTGAAATAC   |
|                     | CR7T-XhoI-speI-FseI-F             | CTCGAGACTAGTGGCCGGCCGTTTTGTGCATCGCTTTTTGTGCG         |
|                     | U6B/CR7T-AgeI/KpnI-R              | GGTACCTGTTTAAACTACCGGTAAAAAAGCACCGACTCGGTGCCAC       |
| TA-U6B/CR7T-gRNA -B | U6B-AgeI-F                        | CATACCGGTGTTTCGACTTGCAGCCTGAAATAC                    |
|                     | CR7T-AgeI-F                       | CATACCGTTCGTTTTGTGCATCGCTTTTTGTGCG                   |
|                     | U6B/CR7T-KpnI-R                   | CATGGTACCAAAAAAAGCACCGACTCGGTGCCAC                   |
| TA-U6B/CR7T-gRNA -C | U6B-SpeI-F                        | CATACTAGT GTTCGACTTGCAGCCTGAAATA                     |
|                     | CR7T-SpeI-F                       | CATACTAGTCGTTTTGTGCATCGCTTTTTGTGCG                   |
|                     | U6B/CR7T-SpeI-R                   | CATACTAGTAAAAAAGCACCGACTCGGTGCCAC                    |
| TA-U6B/CR7T-gRNA -D | U6B-KpnI-F                        | CATGGTACCGTTCGACTTGCAGCCTGAAATA                      |
|                     | CR7T-KpnI-F                       | CATGGTACCGTTTTGTGCATCGCTTTTTGTGCG                    |
|                     | U6B/CR7T-KpnI-R                   | CATGGTACCAAAAAAAGCACCGACTCGGTGCCAC                   |

**Table S3** List of primers used to construct the transgenic gRNA vector.

| Target locus                | Primer name            | Primer sequence (5' - 3') Forward and Reverse    |
|-----------------------------|------------------------|--------------------------------------------------|
| <i>yellow</i>               | U6B-yw-gRNA1-KOD-F     | GGTCGGCTGTGTTTTAGAGCTAGAAATAGCAAGTT              |
|                             | U6B-yw-gRNA1-KOD-R     | ACACTCATCCGAAGTATTGAGGAAAACATACCTA               |
|                             | CR7T-yw-gRNA1-KOD-F    | GGTCGGCTGTGTTTTAGAGCTAGAAATAGCAAGTT              |
|                             | CR7T-yw-gRNA1-KOD-R    | ACACTCATCCGAAAGTCTTCCACTCATATACGCT               |
|                             | CR7T-yw-gRNA2-KOD-F    | ACTGGAACCGGTTTTAGAGCTAGAAATAGCAAGTT              |
|                             | CR7T-yw-gRNA2-KOD-R    | GTCCAAAACCCGAAAGTCTTCCACTCATATACGCT              |
| <i>notch</i>                | U6B-notch-gRNA1-KOD-R  | CCGTTCTGGCAAAGATGTCCGAAAGTATTGAGGAAAACATACCTATA  |
|                             | U6B-notch-gRNA2-KOD-R  | TTGTGTTTCGCACGGTGATCCCGAAGTATTGAGGAAAACATACCTATA |
|                             | CR7T-notch-gRNA1-KOD-R | CCGTTCTGGCAAAGATGTCCGAAAGTCTTCCACTCATATACGCTA    |
|                             | CR7T-notch-gRNA2-KOD-R | TTGTGTTTCGCACGGTGATCCCGAAGTCTTCCACTCATATACGCTA   |
| <i>bag of marbles (bam)</i> | U6B-bam-gRNA1-KOD-R    | ACTGCTGGTCGTCGTTGCCGAAAGTATTGAGGAAAACATACCTATA   |
|                             | CR7T-bam-gRNA1-KOD-R   | ACTGCTGGTCGTCGTTGCCGAAAGTCTTCCACTCATATACGCTA     |
|                             | CR7T-bam-gRNA2-KOD-R   | TTAAGGCCAAATGCTCCTCCGAAAGTCTTCCACTCATATACGCTA    |
|                             | CR7T-bam-gRNA3-KOD-R   | CGTACTCACAAGTGCTTTCCGAAAGTCTTCCACTCATATACGCTA    |
| <i>nanos</i>                | U6B-nos-gRNA1-KOD-R    | AATACATGTCTGCAGGCCGAAAGTATTGAGGAAAACATACCTATA    |
|                             | U6B-nos-gRNA2-KOD-R    | CCCATTACGCCGGTGACCCGAAAGTATTGAGGAAAACATACCTATA   |
|                             | CR7T-nos-gRNA1-KOD-R   | AATACATGTCTGCAGGCCGAAAGTCTTCCACTCATATACGCTA      |
|                             | CR7T-nos-gRNA2-KOD-R   | CCCATTACGCCGGTGACCCGAAAGTCTTCCACTCATATACGCTA     |
| <i>cid</i>                  | U6B-cid-gRNA1-KOD-R    | GCTGCCTCCGTCCGGCGTCCGAAAGTATTGAGGAAAACATACCTATA  |
|                             | U6B-cid-gRNA2-KOD-R    | GCTGCTCGGTTTTGCTTTCCGAAAGTATTGAGGAAAACATACCTATA  |
|                             | U6B-cid-gRNA3-KOD-R    | AACGACGACGACACGGCCTTC GAAGTATTGAGGAAAACATACCTATA |
|                             | U6B-cid-gRNA4-KOD-R    | ACTACGGCCTCGAATTCACC GAAGTATTGAGGAAAACATACCTATA  |
| <i>ms(3)k81</i>             | U6B-K81-KOD-F          | TTACGCGGTAGTTTTAGAGCTAGAAATAGCAAGTT              |
|                             | U6B-K81-KOD-R          | TCAGAAATCCGAAGTATTGAGGAAAACATACCTA               |
|                             | gRNA-KOD-F             | GTTTTAGAGCTAGAAATAGCAAGTT                        |

**Table S4** List of primers used for PCR to verify the conditional mutations.

| <b>Target locus</b>         | <b>Primer name</b> | <b>Primer sequence (5' - 3') Forward and Reverse</b> |
|-----------------------------|--------------------|------------------------------------------------------|
| <i>yellow</i>               | yellow-seq-F       | CGGAGCTAATCCGTATCCA                                  |
|                             | yellow-seq-R       | CGCCAGGTAGCTCGTATCTC                                 |
| <i>notch</i>                | Notch-seq-F        | TGGAAGTGTGACCGTTTTACCC                               |
|                             | Notch-seq-R        | GTGGCAAGTTCCATCGTTCAAGCA                             |
| <i>bag of marbles (bam)</i> | Bam-Seq-F          | CAAAGAGTCTGGACGCCATCAT                               |
|                             | Bam-Seq-R          | CGGTTCCACACATTTTCCTTCT                               |
| <i>nanos</i>                | Nos-Seq-F          | TTCGCAGTTGTTTCAAGTTGTCTA                             |
|                             | Nos-Seq-R          | ATCTCGTCCGTTTGCTGGTGA                                |
| <i>ms(3)k81</i>             | K81-seq-F          | GAGATTTCTCACTACTGCTCCTCG                             |
|                             | K81-seq-R          | ACACGAATTGGATATGCGATAGC                              |
