# Supplementary material for: CRISPR/Cas9 Mediates Efficient Conditional Mutagenesis in Drosophila
Source: PubMed Central journal article supplement (PMC4232542; doi:10.1534/g3.114.014159), 2014-09-05
Supplement: supp_g3.114.014159_FigureS8.pdf [file supp_g3.114.014159_FigureS8.pdf]

>10UAS-HSP70 promoter

```
GGCTCGATCCGCTTGCATGCCTGCAGGTCGGAGTACTGTCCTCCGAGCGGAGTACTGTCCTCC
GAGCGGAGTACTGTCCTCCGAGCGGAGTACTGTCCTCCGAGCGGAGTACTGTCCTCCGAGCGG
AAGCTTGCATGCCTGCAGGTCGGAGTACTGTCCTCCGAGCGGAGTACTGTCCTCCGAGCGGAG
TACTGTCCTCCGAGCGGAGTACTGTCCTCCGAGCGGAGTACTGTCCTCCGAGCGGAGACTCTA
GCGAGCGCCGGAGTATAAATAGAGGGCGCTTCGTCTACGGAGCGACAATTCAATTCAAACAAG
CAAAGTGAACACGTCGCTAAGCGAAAGCTAAGCAAATAAAACAAGCGCAGCTGAACAAGCTA
AACAATCTGCAGTAAAGTGCAAGTTAAAGTGAATCAATTAAGTAACCAGCAACCAAGTAA
ATCAACTGCAACTACTGAAATCTGCCAAGAAGTAATTATTGAATACAAGAAGAGAACTCTGA
ATAGGGAATTGG
```

> $\alpha$ Tub84B 3'-UTR

```
CGGCCATCGAATTCGAGCTCGCCCACTAAGCGTCGCGCCACTTCAACGCTCGATGGGAGCGTC
ATTGGTGGGCGGGGTAACCGTCGAAATCAGTGTTCACGCTTCCAATCGCAACAAAAAATTCAC
TGCAACACTGAAAAGCATAACGAAAACGATGAAGATTGTACGAGAAACCATAAAGTATTTTAT
CCACAAAGACACGTATAGCAGAAAAGCCAAGTTAACTCGGCGATAAGTTGTGTACACAAGAA
TAAAATCGGCCAGATTCAGTGTTCAGAAAATAAGAAAACCCCACTATGTTTTTCTTTGCCTTT
TCTTTCTCCAGCGATCATTCAATTCGTGGTGAAAGAACGGGGTCATTGCACGGAGTTTCGACT
GCGGGAAAGCAGAGCTGCCGTTCACTTCGTCTATAATTAGCGCTTTCTATTTTCCCGATTTCGG
GCCGCTGCTGCGCTTTTCCGCTGCTGTTTGTGGCAAGTGTAGCAGCAGGCTGTGCACGCAGT
GTGGCATGCACTTGGCTTTCCACCGTTGGTATCGATTCTCTGGGACGATGAGTCATTCCTTTTCG
GGGCCACAGCATAATCGTTGCCAGCTCACCGAAATGGTGACTTCATTTCTTAACTGCCGTCAA
GCATGCGATTGTACATACATACATATTTATATATGTACATATTTATGTGACTATGGTAGGTCGA
TATAATAGCAATCAACGCAAGCAAATGTGTCAGTCCTGCTTACAGGAACGATTCTATTTAGTA
ATTTTCGTTGTATAAAGTAATTATGTATGTATGTAAGCCCCATAAATCTGAAACAATTAGGCA
AAACCATGCGAAGCTCTCTA
```

**Figure S8** Sequences of the 10UAS-HSP70 promoter and  $\alpha$ Tub84B 3'-UTR used in this study.
