# Supplementary material for: CRISPR/Cas9 Mediates Efficient Conditional Mutagenesis in Drosophila
Source: PubMed Central journal article supplement (PMC4232542; doi:10.1534/g3.114.014159), 2014-09-05
Supplement: supp_g3.114.014159_TableS4.pdf [file supp_g3.114.014159_TableS4.pdf]

**Table S4** List of primers used for PCR to verify the conditional mutations.

| <b>Target locus</b>         | <b>Primer name</b> | <b>Primer sequence (5' - 3') Forward and Reverse</b> |
|-----------------------------|--------------------|------------------------------------------------------|
| <i>yellow</i>               | yellow-seq-F       | CGGAGCTAATCCGTATCCA                                  |
|                             | yellow-seq-R       | CGCCAGGTAGCTCGTATCTC                                 |
| <i>notch</i>                | Notch-seq-F        | TGGAAGTGTGACCGTTTTACCC                               |
|                             | Notch-seq-R        | GTGGCAAGTTCCATCGTTCAAGCA                             |
| <i>bag of marbles (bam)</i> | Bam-Seq-F          | CAAAGAGTCTGGACGCCATCAT                               |
|                             | Bam-Seq-R          | CGGTTCCACACATTTTCCTTCT                               |
| <i>nanos</i>                | Nos-Seq-F          | TTCGCAGTTGTTTCAAGTTGTCTA                             |
|                             | Nos-Seq-R          | ATCTCGTCCGTTTGCTGGTGA                                |
| <i>ms(3)k81</i>             | K81-seq-F          | GAGATTTCTCACTACTGCTCCTCG                             |
|                             | K81-seq-R          | ACACGAATTGGATATGCGATAGC                              |
